# Supplementary figures and images for: Specific GPCRs Elicit Unique Extracellular Vesicle MiRNA Array Signatures: An Exploratory Study
Source: eLife journal article supplement (doi:10.7554/elife.107865), 2025-08-18

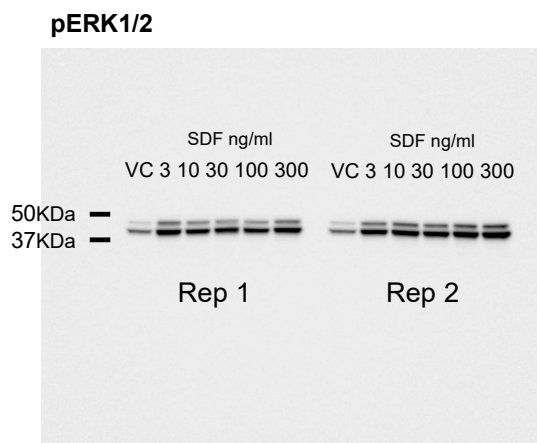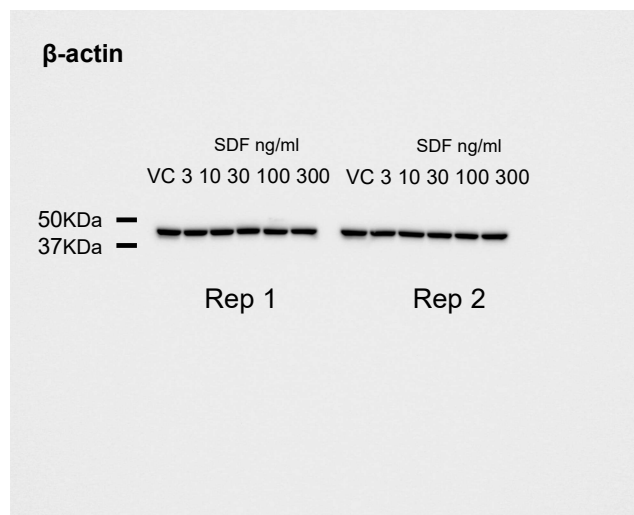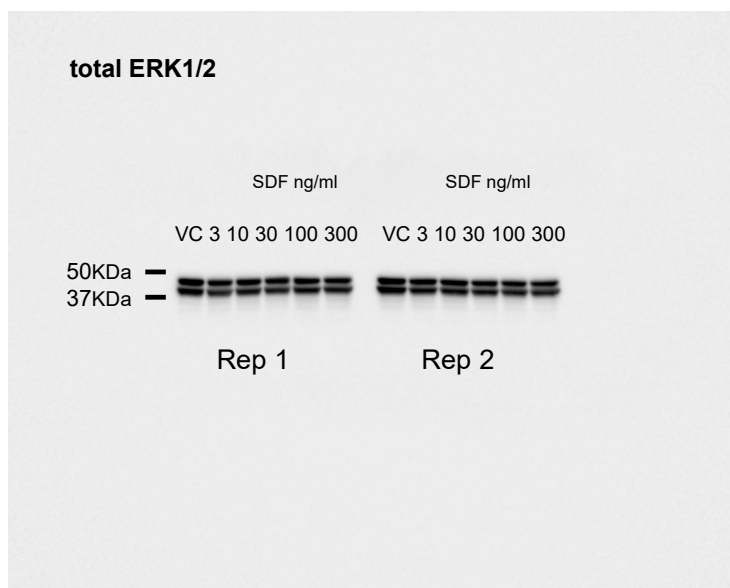

**Figure1-figure supplement 1-Source Data 2.** Original Western blots for Figure1- figure supplement 1.

Supplement: fig1-figsupp1-data2 [file Figure 1-figure supplement 1-source data 2.pdf › Figure 1-figure supplement 1-source data 2.pdf]
